# Supplementary material for: scONE-seq: A one-tube single-cell multi-omics method enables simultaneous dissection of molecular phenotype and genotype heterogeneity from frozen tumors
Source: Research Square preprint supplement (doi:10.21203/rs.3.rs-956200/v1), 2021-10-05
Supplement: Supplementary file 2 [file 229de1c10c99c70830c7b4f1.xlsx]

## Sheet: scONE-seq primers
1st Tagmentation
Primer Name	Oligo Sequences	Length
One-Tn5	GTCTCGTGGGCTCGG TCATG NNNNN AGATGTGTATAAGAGACAG	44
Mosaic	[phos]CTGTCTCTTATACACATCT	25
P5-Tn5	TCGTCGGCAGCGTC AGATGTGTATAAGAGACAG
RT
Primer Name	Oligo Sequences	Length
One-RT-polyT	GTCTCGTGGGCTCGG ATCGT NNNNN TTTTTTTTTTTTTTTTTTTTVN	47
One-RT-GGG	GTCTCGTGGGCTCGG ATCGT NNNNN GGG HN	30
One-RT-TTT	GTCTCGTGGGCTCGG ATCGT NNNNN TTT VN	30
Second Strand Sythesis
Primer Name	Oligo Sequences	Length
2nd-adaptor - 1	GTCTCGTGGGCTCGG ATCGT NNNNN GGG HN	30
Pre-Amplification
Primer Name	Oligo Sequences	Length
Amp-Primer	GATGTGTGGAG GTCTCGTGGGCTCGG	26

## Sheet: Library construction primers
P7 index primers	Sequence
L-N701	CAAGCAGAAGACGGCATACGAGATTCGCCTTAAGATGTGTATAAGAGACAGGTCTCGTGGGCTCGG
L-N702	CAAGCAGAAGACGGCATACGAGATCTAGTACGAGATGTGTATAAGAGACAGGTCTCGTGGGCTCGG
L-N703	CAAGCAGAAGACGGCATACGAGATTTCTGCCTAGATGTGTATAAGAGACAGGTCTCGTGGGCTCGG
L-N704	CAAGCAGAAGACGGCATACGAGATGCTCAGGAAGATGTGTATAAGAGACAGGTCTCGTGGGCTCGG
L-N705	CAAGCAGAAGACGGCATACGAGATAGGAGTCCAGATGTGTATAAGAGACAGGTCTCGTGGGCTCGG
L-N706	CAAGCAGAAGACGGCATACGAGATCATGCCTAAGATGTGTATAAGAGACAGGTCTCGTGGGCTCGG
L-N707	CAAGCAGAAGACGGCATACGAGATGTAGAGAGAGATGTGTATAAGAGACAGGTCTCGTGGGCTCGG
L-N710	CAAGCAGAAGACGGCATACGAGATCAGCCTCGAGATGTGTATAAGAGACAGGTCTCGTGGGCTCGG
L-N711	CAAGCAGAAGACGGCATACGAGATTGCCTCTTAGATGTGTATAAGAGACAGGTCTCGTGGGCTCGG
L-N712	CAAGCAGAAGACGGCATACGAGATTCCTCTACAGATGTGTATAAGAGACAGGTCTCGTGGGCTCGG
L-N714	CAAGCAGAAGACGGCATACGAGATTCATGAGCAGATGTGTATAAGAGACAGGTCTCGTGGGCTCGG
L-N715	CAAGCAGAAGACGGCATACGAGATCCTGAGATAGATGTGTATAAGAGACAGGTCTCGTGGGCTCGG
L-N716	CAAGCAGAAGACGGCATACGAGATTAGCGAGTAGATGTGTATAAGAGACAGGTCTCGTGGGCTCGG
L-N718	CAAGCAGAAGACGGCATACGAGATGTAGCTCCAGATGTGTATAAGAGACAGGTCTCGTGGGCTCGG
L-N719	CAAGCAGAAGACGGCATACGAGATTACTACGCAGATGTGTATAAGAGACAGGTCTCGTGGGCTCGG
L-N720	CAAGCAGAAGACGGCATACGAGATAGGCTCCGAGATGTGTATAAGAGACAGGTCTCGTGGGCTCGG
L-N721	CAAGCAGAAGACGGCATACGAGATGCAGCGTAAGATGTGTATAAGAGACAGGTCTCGTGGGCTCGG
L-N722	CAAGCAGAAGACGGCATACGAGATCTGCGCATAGATGTGTATAAGAGACAGGTCTCGTGGGCTCGG
L-N723	CAAGCAGAAGACGGCATACGAGATGAGCGCTAAGATGTGTATAAGAGACAGGTCTCGTGGGCTCGG
L-N724	CAAGCAGAAGACGGCATACGAGATCGCTCAGTAGATGTGTATAAGAGACAGGTCTCGTGGGCTCGG
L-N726	CAAGCAGAAGACGGCATACGAGATGTCTTAGGAGATGTGTATAAGAGACAGGTCTCGTGGGCTCGG
L-N727	CAAGCAGAAGACGGCATACGAGATACTGATCGAGATGTGTATAAGAGACAGGTCTCGTGGGCTCGG
L-N728	CAAGCAGAAGACGGCATACGAGATTAGCTGCAAGATGTGTATAAGAGACAGGTCTCGTGGGCTCGG
L-N729	CAAGCAGAAGACGGCATACGAGATGACGTCGAAGATGTGTATAAGAGACAGGTCTCGTGGGCTCGG
P5 index primers	Sequence
S502	AATGATACGGCGACCACCGAGATCTACACCTCTCTATTCGTCGGCAGCGTC
S503	AATGATACGGCGACCACCGAGATCTACACTATCCTCTTCGTCGGCAGCGTC
S505	AATGATACGGCGACCACCGAGATCTACACGTAAGGAGTCGTCGGCAGCGTC
S506	AATGATACGGCGACCACCGAGATCTACACACTGCATATCGTCGGCAGCGTC
S507	AATGATACGGCGACCACCGAGATCTACACAAGGAGTATCGTCGGCAGCGTC
S508	AATGATACGGCGACCACCGAGATCTACACCTAAGCCTTCGTCGGCAGCGTC
S510	AATGATACGGCGACCACCGAGATCTACACCGTCTAATTCGTCGGCAGCGTC
S511	AATGATACGGCGACCACCGAGATCTACACTCTCTCCGTCGTCGGCAGCGTC
S513	AATGATACGGCGACCACCGAGATCTACACTCGACTAGTCGTCGGCAGCGTC
S515	AATGATACGGCGACCACCGAGATCTACACTTCTAGCTTCGTCGGCAGCGTC
S516	AATGATACGGCGACCACCGAGATCTACACCCTAGAGTTCGTCGGCAGCGTC
S517	AATGATACGGCGACCACCGAGATCTACACGCGTAAGATCGTCGGCAGCGTC
S518	AATGATACGGCGACCACCGAGATCTACACCTATTAAGTCGTCGGCAGCGTC
S520	AATGATACGGCGACCACCGAGATCTACACAAGGCTATTCGTCGGCAGCGTC
S521	AATGATACGGCGACCACCGAGATCTACACGAGCCTTATCGTCGGCAGCGTC
S522	AATGATACGGCGACCACCGAGATCTACACTTATGCGATCGTCGGCAGCGTC

## Sheet: Customized sequencing primers
Customized sequencing primers for Illumina platform
Read 1	TCGTCGGCAGCGTC AGATGTGTATAAGAGACAG
I7 Index primer	CCGAGCCCACGAGAC CTGTCTCTTATACACATCT
I5 Index primer	CTGTCTCTTATACACATCT GACGCTGCCGACGA
Read 2	AGATGTGTATAAGAGACAG GTCTCGTGGGCTCGG
