# Supplementary material for: scONE-seq: A one-tube single-cell multi-omics method enables simultaneous dissection of molecular phenotype and genotype heterogeneity from frozen tumors
Source: Research Square preprint supplement (doi:10.21203/rs.3.rs-956200/v1), 2021-10-05
Supplement: Supplementary file 3 [file 0de140a72ce2b8d598be490a.xlsx]

## Sheet: Sheet1
Experiment information						Sequencing data
Batch	Assay type	RT program	PCR annealing temperature	PCR extension time	Other variables	All	DNA	RNA	Unmatched	LowQC	Mislabel Rate (RNA/DNA)
Batch 1	PCR extension time	45˚C 50min; 50˚C 50min	65˚C	2min	Only input DNA	1990355	749102	468136	310470	462647	0.62493
Batch 1	PCR extension time	45˚C 50min; 50˚C 50min	65˚C	2min	Only input DNA; no RT primers	1358039	642632	30994	304149	380264	0.0482298
Batch 1	PCR extension time	45˚C 50min; 50˚C 50min	65˚C	4min	Only input DNA	1957897	1152915	263226	250488	291268	0.228313
Batch 1	PCR extension time	45˚C 50min; 50˚C 50min	65˚C	4min	Only input DNA; no RT primers	2023494	1505816	15845	241977	259856	0.0105225
Batch 2	RT program	50˚C 50min; 55˚C 50min	68˚C	4min	Only input DNA	1175587	794463	105355	112921	162848	0.132612
Batch 2	RT program	50˚C 50min; 55˚C 50min	68˚C	4min	Only input DNA; no RT primers	949388	773490	8207	73007	94684	0.0106104
Batch 3	PCR annealing temperature	50˚C 50min; 55˚C 50min	72˚C	4min	Only input DNA	537035	425987	36951	36098	37999	0.0867421
Batch 3	PCR annealing temperature	50˚C 50min; 55˚C 50min	72˚C	4min	Only input DNA; no RT primers	469775	402217	3748	31230	32580	0.00931835
Batch 3	PCR annealing temperature	50˚C 50min; 55˚C 50min	72˚C	4min	Only input DNA	616477	470601	78494	33952	33430	0.166795
Batch 3	PCR annealing temperature	50˚C 50min; 55˚C 50min	72˚C	4min	Only input DNA; no RT primers	347470	305282	6473	16537	19178	0.0212033
Batch 4	Repeat	50˚C 50min; 55˚C 50min	72˚C	4min	Only input DNA	5834731	4291590	484847	356410	701884	0.112976
Batch 4	Repeat	50˚C 50min; 55˚C 50min	72˚C	4min	Only input DNA	4417394	3151973	384623	303770	577028	0.122026
Batch 4	Repeat	50˚C 50min; 55˚C 50min	72˚C	4min	Input E.coli DNA; human RNA	3214320	1946111	538297	274679	455233	0.086749	calculated from mapping results
Batch 4	Repeat	50˚C 50min; 55˚C 50min	72˚C	4min	Input E.coli DNA; human RNA	3586237	2021163	685016	344682	535376	0.085252
Batch 4	Repeat	50˚C 50min; 55˚C 50min	72˚C	4min	Input E.coli DNA; human RNA	2139106	1118362	451835	227962	340947	0.109587
